# Supplementary material for: Structure and mechanism of error-free replication past the major benzo[a]pyrene adduct by human DNA polymerase κ
Source: PubMed Central journal article supplement — Nucleic Acids Res. 2016 Mar 31;44(10):4957–67. doi: 10.1093/nar/gkw204 (PMC4889944; doi:10.1093/nar/gkw204), 2016-03-31
Supplement: supp_gkw204_nar-03675-m-2015-File007.pdf [file supp_gkw204_nar-03675-m-2015-File007.pdf]

## SUPPLEMENTARY FIGURES AND TABLES

**A**

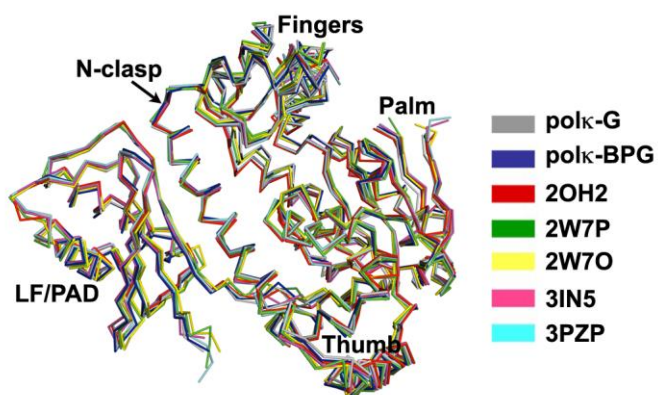

**B**

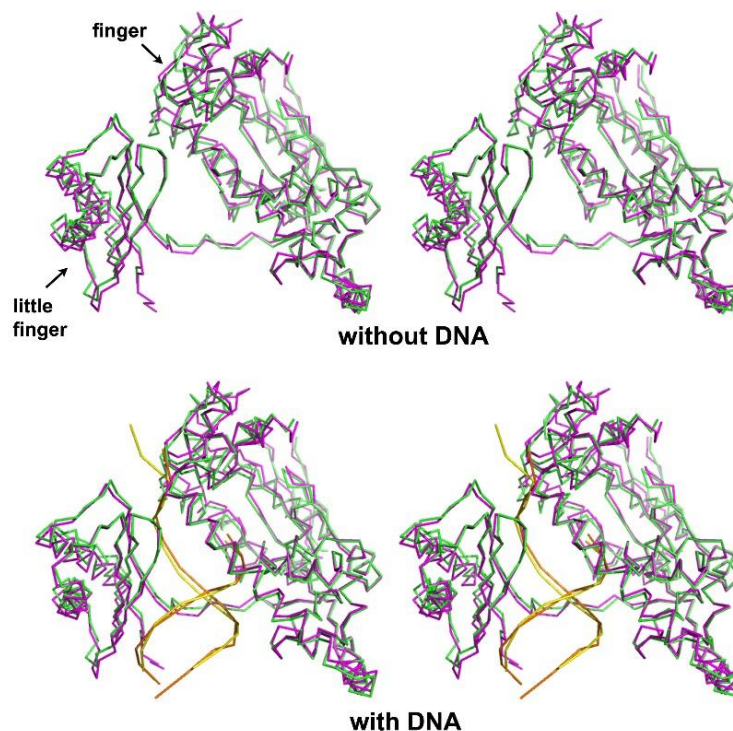

**Figure S1.** (A) The superposition of polk structures is shown. Polk-G and polk-BPG are from this work. 2OH2, 2W7P, 2W7O, 3IN5 and 3PZP are the polk structures from previously published ternary complexes of polk with either unmodified DNA (2OH2) or DNA containing 8-oxy-G. (B) Stereo views are shown for polk-G (magenta) and a previous polk structure (2OH2, green). No significant conformational change in polk is seen when comparing different polk-DNA-dNTP ternary complexes. The root-mean-squared deviations (rmsd) are 0.7-0.9 Å over ~423 Ca atoms in pair-wise comparisons among the polk structures.

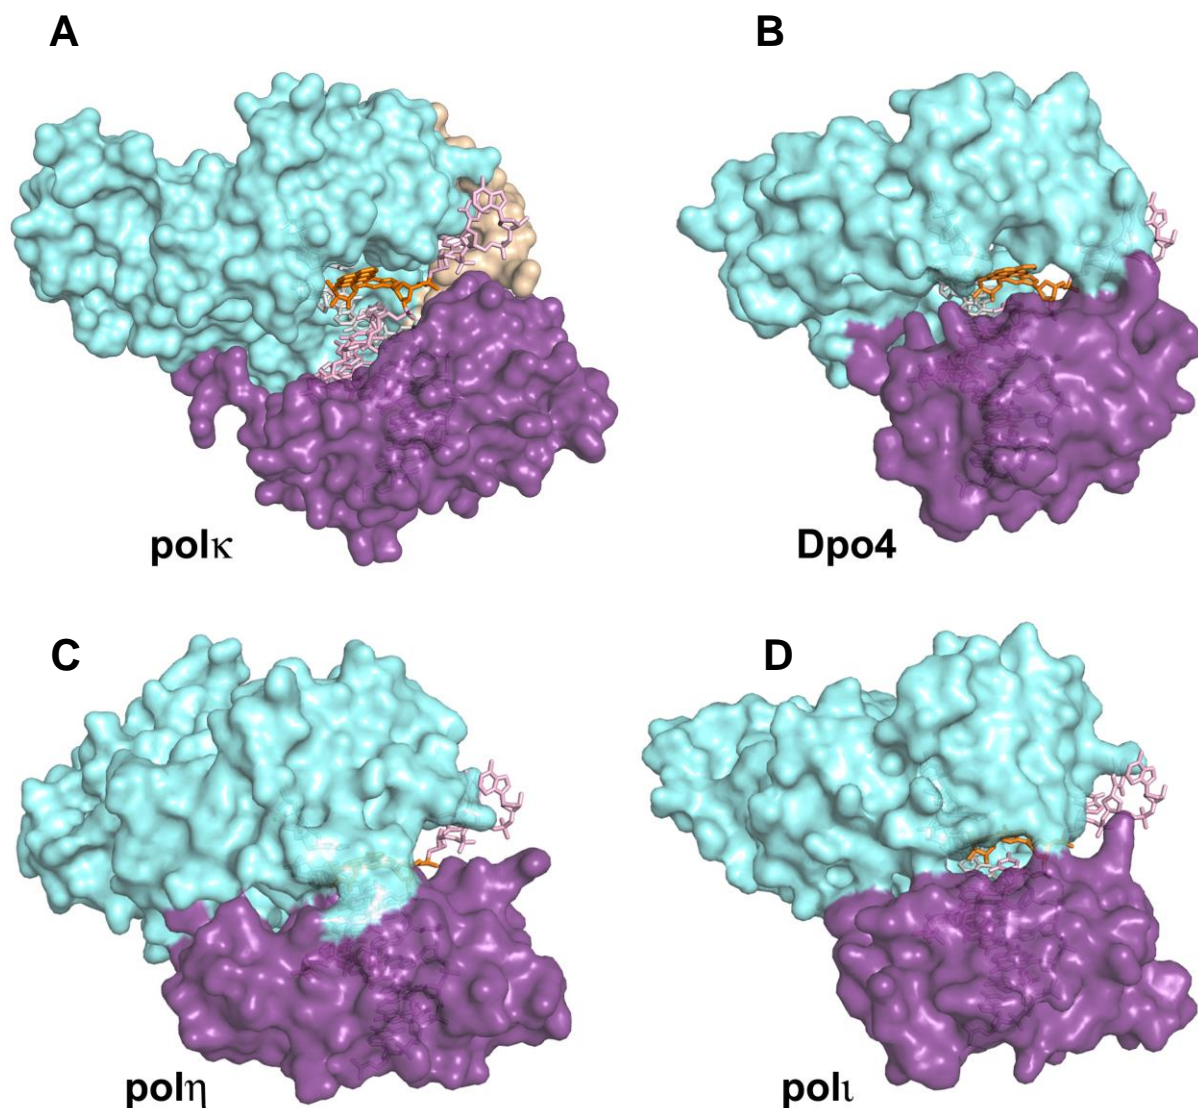

**Figure S2.** A comparison is shown of the minor groove sides of Y-family DNA polymerases. Core domains are in cyan, LF domains in purple, DNA in sticks, and the BP-dG adduct in orange. All four proteins are placed in the same orientation by superimposing their palm domains. Panels are the back view, with minor grooves of DNA facing toward the reader. (A) The polκ-BPG structure from this work. (B-D) The Dpo4 (1JX4), polη (3MR2) and polι (3GV8) structures are modelled with the DNA substrate from the polκ-BPG complex. Only polκ (panel A) has BP-dG snugly packed against the core domains, while the other three Y-pols clash with the bulky lesion at the minor groove side of DNA.

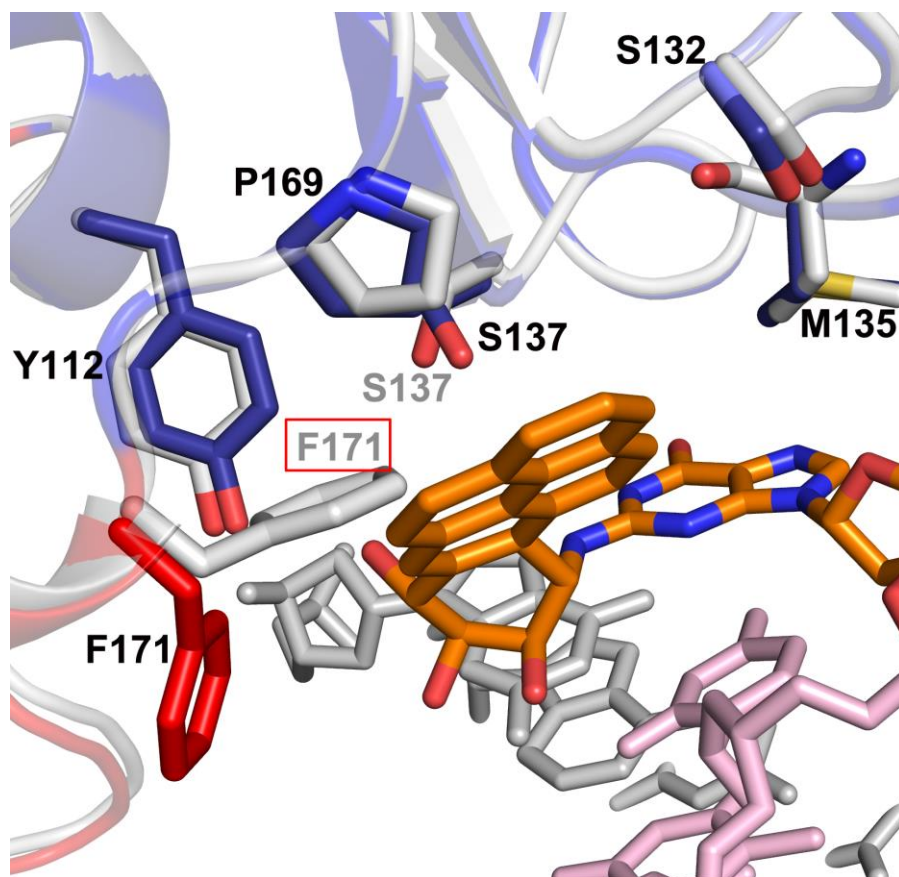

**Figure S3.** A superposition is shown for the residues surrounding the BPDE rings in polκ-BPG (colored) and those in polκ-G (light grey). Two residues (F171, S137) change conformation. F171 flips to the left to avoid steric conflicts with the BPDE ring (orange) in the polκ-BPG structures. S137 rotates to contact the ring in the BP-dG-modified DNA. DNA is in stick with the primer in grey, template in pink and BP-dG in orange.

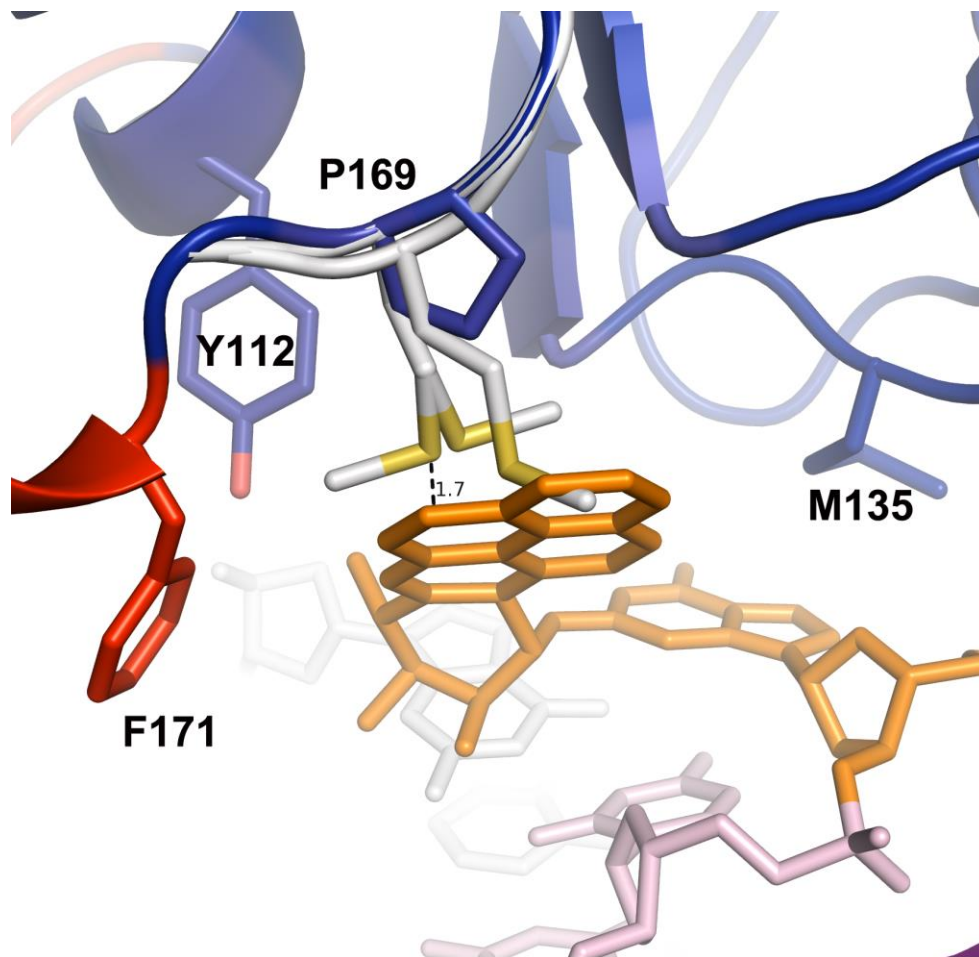

**Figure S4.** Methionine is modelled at the P169 position. P169 was mutated to methionine. Possible rotamers of methionine that would impose steric clashes with BP-dG are shown in light grey sticks. The side chain of methionine would be too close to the bulky ring of BP (indicated with a dashed line and a 1.7 Å distance). The template strand is in pink, primer strand in grey, and BP-dG in orange. Residues are in the colors of the domains to which they belong.

3' CCCCCTTCCTAAG\*TACT  
 5' GGGGAAGGATTC

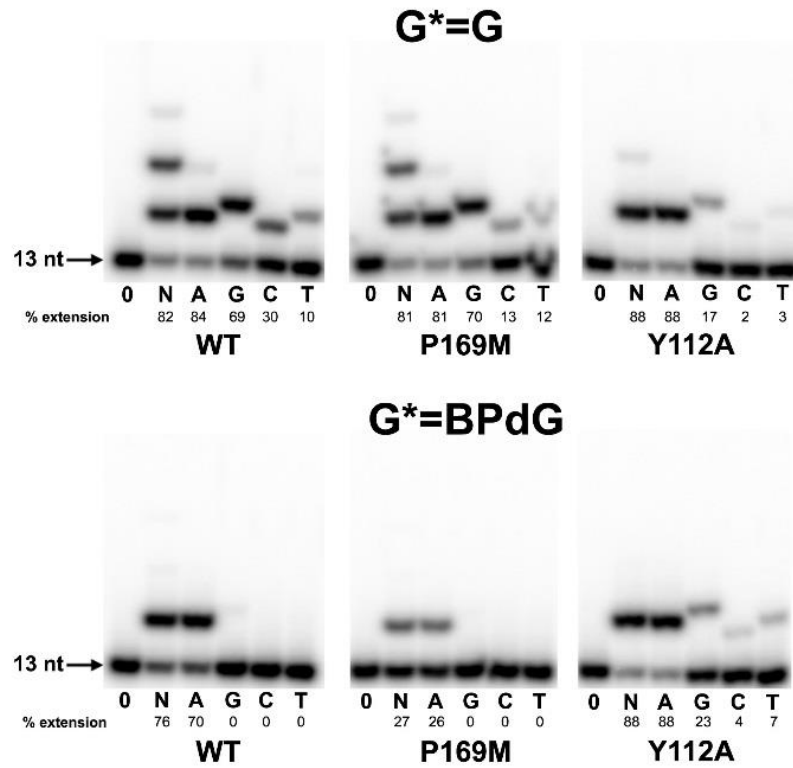

**Figure S5.** Replication assays are shown for extending primers after unmodified G or BP-dG using mutant polks (extension stage). The sequence of the DNA substrate is on the top of the gel images. When comparing the ability of wild-type (WT) and mutant polk to bypass BP-dG (lower panel), less significant difference exists in the extension stage than in the insertion stage (Figure 1B).

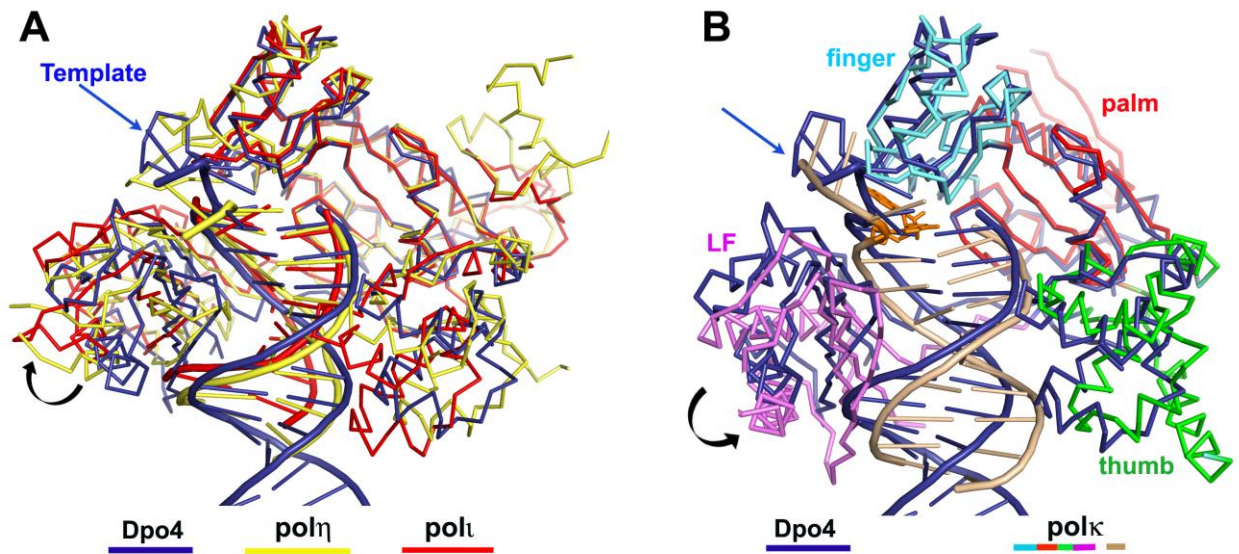

**Figure S6.** This comparison of Y-family polymerases shows domain and DNA movements relative to those of Dpo4. Proteins are shown in the same orientation (front views) by being superimposed on their palm domains. Green arrows point to the templates, and black curved arrows indicate movements of the LF domains of polη, polι, and polκ relative to the LF of Dpo4. **(A)** The superposition of polι, polη, and Dpo4. The LF domains of polι and polη rotate and closer to the minor groove (the back side) when compared to the LF of Dpo4 (blue). The positions of the template strands are superimposable near the active sites in polι, polη and Dpo4. **(B)** The superposition of polκ and Dpo4. The black arrow indicates the polκ's LF domain (pink) moves towards the major groove side (the front side) of the DNA, in an opposite direction relative to polι and polη, when compared to Dpo4 (blue). The position of the template (beige) in polκ also deviates from that (blue) in Dpo4. The N-clasp domain was removed for clarity.

**Supplementary Table 1. Average rmsd of DNA molecules superposed over P atoms in the ss-DNA regions**

| <b>Structures</b> | <b>Pol-G</b> | <b>Pol-BPG</b> | <b>NMR (1AXO)</b> | <b>2OH2</b> |
|-------------------|--------------|----------------|-------------------|-------------|
| <b>Pol-G</b>      |              | 0.54           | 3.25              | 0.98        |
| <b>Pol-BPG</b>    | 0.54         |                | 3.46              | 1.01        |
| <b>NMR (1AXO)</b> | 3.25         | 3.46           |                   | 5.25        |
| <b>2OH2</b>       | 0.98         | 1.01           | 5.25              |             |

**Supplementary Table 2. B-factors of BPDE ring atoms when refined either in 5' and 3' orientations for the two complexes in the asymmetric unit**

| Group  | Atom | Molecule A<br>BPDE refined in |                          | Molecule B<br>BPDE refined in |                          |
|--------|------|-------------------------------|--------------------------|-------------------------------|--------------------------|
|        |      | 5' oriented <sup>a</sup>      | 3' oriented <sup>b</sup> | 5' oriented <sup>a</sup>      | 3' oriented <sup>b</sup> |
| epoxy  | C4'  | 43.7                          | 67.5                     | 45.7                          | 68.4                     |
|        | C3'  | 41.7                          | 76.0                     | 42.0                          | 76.3                     |
|        | C2'  | 47.3                          | 77.6                     | 53.8                          | 73.8                     |
|        | C1'  | 48.8                          | 92.4                     | 53.2                          | 84.0                     |
|        | O1   | 61.3                          | 76.2                     | 61.3                          | 69.4                     |
|        | O2   | 53.7                          | 72.5                     | 59.7                          | 70.8                     |
|        | O3   | 46.7                          | 69.4                     | 47.5                          | 80.8                     |
| pyrene | C61  | 49.9                          | 75.8                     | 50.6                          | 70.4                     |
|        | C7   | 46.8                          | 96.7                     | 51.5                          | 82.6                     |
|        | C81  | 54.3                          | 97.8                     | 61.6                          | 87.1                     |
|        | C8A  | 60.6                          | 106.0                    | 62.8                          | 97.0                     |
|        | C5A  | 60.4                          | 74.3                     | 57.7                          | 64.5                     |
|        | C5B  | 61.6                          | 105.0                    | 65.2                          | 91.8                     |
|        | C51  | 55.1                          | 63.0                     | 55.7                          | 56.4                     |
|        | C41  | 63.1                          | 80.3                     | 57.7                          | 75.6                     |
|        | C3B  | 67.7                          | 109.0                    | 68.1                          | 95.9                     |
|        | C1A  | 69.7                          | 111.2                    | 69.0                          | 97.9                     |
|        | C10  | 60.8                          | 106.8                    | 60.9                          | 98.6                     |
|        | C9   | 58.1                          | 100.0                    | 57.3                          | 90.8                     |
|        | C1   | 67.6                          | 107.7                    | 64.4                          | 97.4                     |
|        | C3A  | 72.5                          | 97.6                     | 67.8                          | 91.7                     |
|        | C3   | 78.9                          | 94.0                     | 69.5                          | 93.5                     |
| C21    | 72.4 | 101.6                         | 66.9                     | 100.5                         |                          |

a.  $R_{\text{work}}/R_{\text{free}} = 0.212/0.252$

b.  $R_{\text{work}}/R_{\text{free}} = 0.216/0.256$



**Supplementary Table 3. Local base-pair/step parameters comparison between different Polκ and NMR DNAs determined by 3DNA analyze program.**

| B              | Buckle   |        |       |        | Propeller |        |       |        |
|----------------|----------|--------|-------|--------|-----------|--------|-------|--------|
|                | Polκ-BPG | Polκ-G | 2OH2  | 1AXO   | Polκ-BPG  | Polκ-G | 2OH2  | 1AXO   |
| 1 <sup>a</sup> | 4.38     | 33.89  | 8.84  | -24.20 | 18.89     | -7.93  | -0.03 | -19.32 |
| 2              | 29.59    | 20.02  | -3.09 | -11.55 | 1.21      | -8.46  | -3.49 | 3.00   |
| 3              | 11.19    | 7.74   | 9.57  | 16.82  | -1.93     | -3.43  | 0.91  | -14.10 |
| 4              | 4.23     | 4.51   | 13.41 | 20.74  | -1.38     | -0.87  | 5.42  | -18.57 |
| 5              | -2.62    | 6.92   | 0.52  | 30.60  | -9.31     | -3.27  | 2.82  | -30.08 |
| 6              | -6.63    | -1.52  | -5.53 | -14.49 | -7.08     | -2.64  | 1.67  | -4.33  |
| 7              | -8.50    | -7.24  | -6.66 | -0.52  | -13.55    | -12.89 | -4.39 | -11.92 |
| 8              | 2.04     | -5.72  | -2.64 | 15.77  | -6.13     | -8.07  | -8.66 | -13.67 |
| 9              | -6.13    | -7.91  | -5.35 | 18.64  | -8.83     | -5.84  | -4.56 | -6.19  |
| 10             | -6.79    | -5.75  | -2.52 | -4.30  | -11.46    | -11.16 | 6.67  | 16.81  |
| <b>Avg.</b>    | 2.08     | 4.50   | 0.65  | 4.75   | -3.96     | -6.46  | -0.36 | -9.84  |
| <b>s.d.</b>    | 11.58    | 13.57  | 7.24  | 18.16  | 9.28      | 3.91   | 4.85  | 13.05  |

| step                                        | Rise   |               |      |             | Tilt   |             |       |               | Twist  |       |       |       |
|---------------------------------------------|--------|---------------|------|-------------|--------|-------------|-------|---------------|--------|-------|-------|-------|
|                                             | PolBPG | PolG          | 2OH2 | 1AXO        | PolBPG | PolG        | 2OH2  | 1AXO          | PolBPG | PolG  | 2OH2  | 1AXO  |
| 1 <sup>b</sup>                              | 4.62   | 3.22          | 3.20 | 2.92        | 0.16   | 5.40        | 1.13  | -12.60        | 33.93  | 23.96 | 19.68 | 43.28 |
| 2                                           | 3.05   | 3.04          | 3.64 | 2.34        | -1.45  | 4.05        | 3.80  | 4.14          | 24.12  | 27.04 | 34.61 | 19.84 |
| 3                                           | 3.21   | 3.26          | 3.43 | 3.45        | -4.18  | -2.15       | -2.48 | 1.82          | 29.65  | 27.84 | 30.52 | 31.13 |
| 4                                           | 3.15   | 3.39          | 3.11 | 2.82        | 3.90   | 6.22        | 0.83  | 7.29          | 29.09  | 32.38 | 28.26 | 38.32 |
| 5                                           | 3.24   | 3.22          | 3.38 | 4.87        | -2.27  | -2.71       | -0.59 | -3.26         | 32.78  | 30.11 | 35.75 | 43.64 |
| 6                                           | 3.28   | 3.09          | 3.41 | 3.38        | -1.47  | -3.56       | -0.80 | 2.45          | 35.74  | 34.27 | 31.23 | 30.03 |
| 7                                           | 3.65   | 3.44          | 3.45 | 2.87        | 3.48   | -2.01       | -2.07 | -2.06         | 31.34  | 35.50 | 24.35 | 32.34 |
| 8                                           | 3.10   | 3.26          | 3.35 | 3.30        | 0.19   | 3.66        | 3.72  | 4.31          | 29.04  | 29.20 | 38.39 | 44.64 |
| 9                                           | 3.25   | 3.27          | 3.40 | 4.06        | -5.06  | -0.50       | 4.81  | 1.47          | 32.44  | 34.34 | 36.49 | 34.66 |
| <b>Avg.</b>                                 | 3.39   | 3.24          | 3.38 | 3.33        | -0.74  | 0.93        | 0.93  | 0.40          | 30.90  | 30.52 | 31.03 | 35.32 |
| <b>s.d.</b>                                 | 0.49   | 0.12          | 0.15 | 0.75        | 3.06   | 3.85        | 2.67  | 5.84          | 3.41   | 3.89  | 6.13  | 8.08  |
| Minor groove width (based on P-P distances) |        |               |      |             |        |             |       |               |        |       |       |       |
| <b>Polκ-BPG</b>                             |        | <b>Polκ-G</b> |      | <b>2OH2</b> |        | <b>1AXO</b> |       | <b>B-DNA*</b> |        |       |       |       |
| 12.0-14.3                                   |        | 13.2-14.1     |      | 13.2-14.5   |        | 8.1-11.7    |       | 11.7          |        |       |       |       |

a base-pair corresponds to the templating base and incoming nucleotide

b base-pairs corresponds to the templating base and incoming nucleotide and -1 base pairs

\*B-DNA reconstructed using 3-DNA reconstruction program using the Polκ-G DNA sequence.

**All DNAs listed in the table is in B-form as determined by the 3DNA analyze program.**
